# Supplementary material for: ZnSe Nanorods as Visible‐Light Absorbers for Photocatalytic and Photoelectrochemical H2 Evolution in Water
Source: PubMed Central journal article supplement (PMC6492148; doi:10.1002/anie.201814265), 2019-03-06
Supplement: ANIE-58-5059-s001.pdf [file ANIE-58-5059-s001.pdf]

## Supporting Information

### **ZnSe Nanorods as Visible-Light Absorbers for Photocatalytic and Photoelectrochemical H<sub>2</sub> Evolution in Water**

*Moritz F. Kuehnel<sup>+</sup>, Charles E. Creissen<sup>+</sup>, Constantin D. Sahm<sup>+</sup>, Dominik Wielend, Anja Schlosser, Katherine L. Orchard, and Erwin Reisner\**

anie\_201814265\_sm\_miscellaneous\_information.pdf

## Experimental Section

**Materials.** Zinc stearate (purum, Sigma-Aldrich), octadecane (99 %, Sigma-Aldrich), trioctylphosphine (90 %, Sigma-Aldrich), selenium powder (99 %, Sigma-Aldrich), *n*-heptane (99 %, Aldrich), methanol (99.8 %, Fisher-scientific), acetone (laboratory reagent grade, Fisher-scientific), 1-butanol (99 %, Alfa Aesar), trimethyloxonium tetrafluoroborate (96 %, Sigma-Aldrich), tetramethyl ammonium hydroxide pentahydrate (99 %, Sigma-Aldrich), 3-mercaptopropionic acid (MPA, ≥99 %, Sigma-Aldrich), L-ascorbic acid (99 %, Sigma-Aldrich), Fe(BF<sub>4</sub>)<sub>2</sub>·6 H<sub>2</sub>O (97 %, Sigma-Aldrich), Co(BF<sub>4</sub>)<sub>2</sub>·6 H<sub>2</sub>O (99 %, Sigma-Aldrich), Ni(BF<sub>4</sub>)<sub>2</sub>·6 H<sub>2</sub>O (99 %, Acros) and K<sub>2</sub>PtCl<sub>4</sub> (99.9 %, Sigma-Aldrich), Pt colloids (3 nm, 1000 ppm in water, Sigma-Aldrich) were used as received. Anhydrous solvents were purchased from Acros Organics with the following purities: CHCl<sub>3</sub> (99.9 %), *N,N*-dimethylformamide (DMF, 99.8 %), acetonitrile (ACN, 99.9 %). Cu(acetate)<sub>2</sub>·H<sub>2</sub>O (ACROS Organics, ACS reagent), Cr(NO<sub>3</sub>)<sub>3</sub>·9H<sub>2</sub>O (Sigma-Aldrich, ≥99 %), and triethanolamine (Sigma-Aldrich, ≥99.5 %) were used for CuCrO<sub>2</sub> film preparation. ITO-coated glass sheets (Vision Tek Systems Ltd., R = 12 Ω cm<sup>-2</sup>, thickness of 1.1 mm) were cut into 3 × 3 cm<sup>2</sup> slides then scored into 1 × 1.5 cm<sup>2</sup> before use. All aqueous experimental solutions were prepared with distilled water and all aqueous analytical samples were prepared with ultrapure water (DI water; Milli-Q®, 18.2 MΩ cm).

**ZnSe-St.**<sup>[1]</sup> A zinc precursor solution was prepared by mixing zinc stearate (632 mg, 1.00 mmol) and octadecane (8 g) in a 50 mL three-necked flask and degassed at 50 °C for 2 h before raising the temperature to 300 °C under N<sub>2</sub>. A selenium precursor solution was prepared by dissolving Se powder (79.0 mg, 1.00 mmol) in trioctylphosphine (2.5 mL) under N<sub>2</sub> at 50 °C for 50 min. The Se solution was then heated to 100 °C and quickly injected into the stirred Zn solution (500 rpm) with a glass syringe. After stirring the reaction mixture for 25 min at 300 °C, it was quenched by placing the flask into a cold oil bath. When a temperature of 55 °C was reached, *n*-heptane (40 mL) was quickly added to prevent octadecane solidification. The mixture was divided into 4 equal parts, and to each part methanol (10 mL) was added to precipitate ZnSe-St followed by adding acetone (2x10 mL) to form a single phase. Particles were separated by centrifugation (6,500 rpm, 8 min) and washed by repeated dissolution in CHCl<sub>3</sub> (5 mL), precipitation with methanol (15 mL), and centrifugation (6,500 rpm, 8 min). The precipitate was mechanically separated from the tube walls, dispersed in 1-butanol (10 mL), sonicated for 10 min and separated by centrifugation (6,500 rpm, 8 min). Residual butanol was removed by repeatedly adding methanol (10 mL), sonicating for 10 min and centrifugation (6,500 rpm, 8 min). Finally, the washed ZnSe-St was dissolved in CHCl<sub>3</sub> (3-4 mL) and centrifuged (6,500 rpm, 8 min), resulting in a cloudy upper layer, a clear middle layer and some precipitate on the bottom. The clear middle solution was collected and stored as stock solution at 4 °C.

**ZnSe-BF<sub>4</sub>.**<sup>[2]</sup> ZnSe-St (6-10 mL stock solution) were placed in a Schlenk flask and the solvent was removed *in vacuo*. The residue was dissolved in anhydrous CHCl<sub>3</sub> (3.0 mL) and anhydrous DMF (0.20 mL) under N<sub>2</sub>. [Me<sub>3</sub>O][BF<sub>4</sub>] (1.0 M in anhydrous MeCN, 3-5 mL) was added dropwise, causing ZnSe-BF<sub>4</sub> to precipitate. The mixture was centrifuged (10,000 rpm, 10 min), the supernatant discarded, and precipitate re-dispersed in anhydrous DMF (3-4 mL), followed by sonication (20 min) and centrifugation (10,000 rpm, 10 min). The clear supernatant was degassed by two freeze-pump-thaw cycles and stored under N<sub>2</sub> at 4 °C.

**ZnSe-MPA.**<sup>[3]</sup> Tetramethyl ammonium hydroxide (TMAOH, 25 % in water, 1 mL) was added to a solution of mercaptopropionic acid (0.75 mL) in 1:1 CHCl<sub>3</sub>/MeOH (15 mL) and the pH was adjusted to 11 by adding solid TMAOH (approx. 16 scoops). Under N<sub>2</sub>, this solution was added to ZnSe-St (3 mL stock solution) and stirred at 300 rpm for 70 h in the dark. Subsequently, acetone (50 mL) was added and ZnSe-MPA was separated by centrifugation (6,500 rpm, 8 min). The precipitate was repeatedly suspended in acetone (5-10 mL), sonicated (5 min), and separated by centrifugation (6,500 rpm, 8 min). Finally, solid ZnSe-MPA was left to dry in air for 1 min and dissolved in water (1.0 mL). The resulting clear solution was degassed by two freeze-pump-thaw cycles and stored under N<sub>2</sub> at 4 °C.

**Powder X-ray diffraction (XRD).** XRD was conducted using a PANalytical Empyrean Series 2 instrument using CuK<sub>α</sub> irradiation. 100 μL ZnSe nanorod stock solution were drop-casted onto a Si wafer and dried under vacuum.

**Inductively-coupled plasma-optical emission spectroscopy (ICP-OES).** The concentration of all ZnSe nanorod stock solutions was determined by ICP-OES. Measurements were carried-out by the Microanalysis Services, Department of Chemistry, University of Cambridge using a Thermo Scientific iCAP 7400 spectrometer. Samples were digested in HNO<sub>3</sub> and diluted with ultrapure water to 1-10 ppm analyte concentration, and the Zn<sup>2+</sup> concentration was determined. Blank samples of diluted HNO<sub>3</sub> were recorded as background. The ZnSe concentration was calculated from the determined Zn<sup>2+</sup> concentration assuming an ideal 1:1 Zn:Se stoichiometry. CuCrO<sub>2</sub>|ZnSe loading values were determined in triplicate, along with diluted HNO<sub>3</sub> blanks and bare CuCrO<sub>2</sub> electrodes, by digestion of a 1 cm<sup>2</sup> electrode in HNO<sub>3</sub> (1 mL) overnight and dilution to 10% v/v in Milli-Q<sup>®</sup> H<sub>2</sub>O. Both Se and Zn content were determined for these samples.

**Transmission electron microscopy (TEM).** TEM images were collected using a FEI Philips Tecnai F20-G2 TEM, operating at an accelerating voltage of 200 kV located at the Electron Microscopy Suite of the Cavendish Laboratory, University of Cambridge. ZnSe-St stock solutions were diluted 1:1,000 in CHCl<sub>3</sub>, drop-casted onto Cu grids and dried in air. ZnSe-BF<sub>4</sub> stock solutions were diluted 1:5,000 in DMF, drop-casted onto Cu grids and dried under vacuum. The grid was subsequently washed 10 times with CHCl<sub>3</sub> and dried in air. Post-catalysis TEM images were collected using a Thermo Scientific (FEI) Talos F200X G2 TEM, operating at an accelerating voltage of 200 kV located at the Department of Chemistry, University of Cambridge. ZnSe-NRs were precipitated after photocatalysis (3 h) via centrifugation, re-dispersed in DMF (2 mL), diluted (1:25) in H<sub>2</sub>O and drop-casted onto holey-carbon coated Cu grids.

**Scanning electron microscopy (SEM).** SEM images were recorded using a Tescan MIRA3 FEG-SEM. Energy-dispersive X-ray (EDX) spectra were recorded with an Oxford Instruments Aztec Energy X-maxN 80 EDX system (20 kV, 15 mm working distance).

**Photocatalytic H<sub>2</sub> generation.** A ZnSe-NR stock solution (ZnSe-BF<sub>4</sub>, ZnSe-MPA or ZnSe-St, 6.39 mg ZnSe mL<sup>-1</sup>, 15.6 μL) and co-catalyst stock solution (2 mM aq. Ni(BF<sub>4</sub>)<sub>2</sub>·6H<sub>2</sub>O, 20 μL) were diluted in aq. ascorbic acid (0.4 M, pH adjusted to 4.5 with NaOH) to a total volume of 2.00 mL, to give a ZnSe concentration of 50 mg L<sup>-1</sup>. The mixture was then added to a Pyrex photoreactor containing a stirrer bar (7.91 mL internal volume), sealed with a rubber septum and purged with N<sub>2</sub> (2 % CH<sub>4</sub>) for 10 min in the dark. The photoreactor was then thermostated with a water circulator at 25 °C, stirred at 600 rpm and irradiated by a solar light simulator (Newport Oriel, 100 mW cm<sup>-2</sup>) equipped with an air mass 1.5 global filter (AM 1.5G). IR irradiation was filtered with a water filter

(10 cm path length). Where indicated, UV irradiation was filtered with a 400 nm long pass filter (UQG Optics). Generated H<sub>2</sub> was quantified through periodic headspace gas analysis (50 μL) by gas chromatography.

For long-term stability tests, photocatalysis experiments were performed for 21 h, followed by either purging with N<sub>2</sub> (2 % CH<sub>4</sub>) or centrifugation (10 min, 10,000 rpm). The separated precipitate was re-suspended in its original supernatant or in fresh aq. AA (0.4 M, pH 4.5). Alternatively, fresh ZnSe-BF<sub>4</sub> stock solution (6.39 mg ZnSe mL<sup>-1</sup>, 15.6 μL) was added to used supernatant. All samples were sealed, purged with N<sub>2</sub> (2 % CH<sub>4</sub>) for 10 min in the dark and irradiation was continued as stated above.

**Gas chromatography analysis.** Gas chromatography was carried out on either an Agilent 7890A gas chromatograph using a thermal conductivity detector and a HP-5 column (kept at 45 °C) and N<sub>2</sub> as the carrier gas or a Shimadzu Tracera GC2010 Plus gas chromatograph using a barrier ionization discharge (BID) detector and a molsieve column (kept at 130°C) with He as the carrier gas. Methane (2 % CH<sub>4</sub> in N<sub>2</sub>, BOC) was used as internal standard after calibration with different mixtures of known CH<sub>4</sub>/H<sub>2</sub>/N<sub>2</sub> compositions.

**External quantum efficiency (EQE).** Photocatalysis samples were prepared as stated above, but using an airtight, flat-sided quartz cuvette (1 cm path length) as the photoreactor. The cuvette was purged with N<sub>2</sub>/CH<sub>4</sub> (2 %) and irradiated with monochromatic light ( $\lambda = 400\pm 5$  nm,  $I = 1.0$  mW cm<sup>-2</sup>,  $A = 0.20$  cm<sup>2</sup>) using an LOT Quantum Design MSH-300 monochromator. Aliquots of headspace gas were taken periodically and analyzed by gas chromatography. The EQE was calculated according to equation (1).

$$\text{EQE (\%)} = \frac{2n \times N_A \times h \times c}{t_{\text{irr}} \times \lambda \times I \times A} \times 100 \quad (1)$$

Where  $n$  is the amount of H<sub>2</sub> produced per time,  $N_A$  is Avogadro's constant,  $h$  is the Planck constant,  $c$  is the speed of light,  $t_{\text{irr}}$  is the irradiation time,  $\lambda$  is the irradiation wavelength,  $I$  is the irradiation intensity and  $A$  is the irradiated area. The internal quantum yield (IQE) was calculated by dividing the EQE by the extinction at 400 nm.

**Determination of co-catalyst attachment.** After 3 h photocatalytic H<sub>2</sub> production at standard conditions (*vide supra*), the reaction mixtures of 3 experiments were combined, transferred to a centrifuge tube and centrifuged for 10 min at 10,000 rpm. The precipitate was dissolved in conc. HNO<sub>3</sub> (2 mL) and diluted to 10 mL with ultrapure water. By ICP-OES, the Ni:Se ratio was found to be 0.450 ng Ni per μg Se. Using the ZnSe bulk density of 5.27×10<sup>6</sup> g m<sup>-3</sup>, the weight of an individual ZnSe-NR (5.2±0.6 nm diameter, 30.0±4.8 nm long) was estimated at 3.36±0.92×10<sup>-18</sup> g, corresponding to a Ni content of 8.26±2.27×10<sup>-22</sup> g or 8.5±2.3 Ni atoms per NR.

**UV-Vis spectroscopy.** UV-Vis spectra were recorded on a Varian Cary 50 UV-Vis spectrophotometer using quartz glass cuvettes (1 cm path length). Spectra of electrodes were recorded in transmission mode with a blank ITO-coated glass background.

**Preparation of CuCrO<sub>2</sub>|ZnSe electrodes.** CuCrO<sub>2</sub> electrodes were prepared directly on ITO-coated glass slides, which were previously cleaned (sonication in isopropanol, ethanol, and acetone, 15 min) and dried at 100 °C. A solution of Cu(acetate)<sub>2</sub>·H<sub>2</sub>O (0.2 M), Cr(NO<sub>3</sub>)<sub>3</sub>·9H<sub>2</sub>O (0.2 M), and triethanolamine (0.2 M), was prepared in absolute ethanol and stirred for 15 h before spin coating

on ITO slides (Laurell WS-650MZ spin coater, 1500 rpm, 15 s, 3000 rpm s<sup>-1</sup> acceleration, 0.4 mL volume). Samples were annealed in a chamber furnace (Carbolite Gero) to 400 °C with a ramp rate of 10 °C min<sup>-1</sup> for 45 min. Spin-coating and annealing steps repeated for a total of 3 layers. A tube furnace fitted with a quartz tube, end seals, and insulation plugs (Carbolite Gero) was used to anneal samples to 600 °C with a 5 °C min<sup>-1</sup> ramp rate for 45 min under Ar flow (150 SCCM). ZnSe was immobilized through dropcasting 8 μL cm<sup>-2</sup> of a stock solution (1.66 mg/mL, acetonitrile) and drying in air. CuCrO<sub>2</sub>|ZnSe photoelectrodes were used directly after preparation.

**Photoelectrochemical measurements.** Photoelectrochemical measurements were conducted in a one-compartment 3-necked cell with a flat borosilicate window, using an Ivium CompactStat potentiostat. A three-electrode setup was used with a Pt-counter, Ag/AgCl/KCl<sub>sat</sub> reference, and a CuCrO<sub>2</sub>-based working electrode (0.25 cm<sup>2</sup> active area). The aqueous Na<sub>2</sub>SO<sub>4</sub> electrolyte solution (0.1 M, pH 5.5) was purged with N<sub>2</sub> for 15 minutes prior to measurements. Electrodes were illuminated from the front using a calibrated Newport Oriel solar light simulator (150 W, 100 mW cm<sup>-2</sup>, AM 1.5G) with an IR water filter and a UQG Optics UV-Filter (λ > 400 nm).

**Controlled potential photoelectrolysis (CPPE).** CPPE experiments were conducted in triplicate at 0.0 V vs. RHE in an airtight two-compartment electrochemical cell with a flat quartz window and a Nafion membrane divider. The working compartment volume was 12 mL with a gas headspace of 5 mL and the counter compartment contained 4.5 mL solution and a 3.5 mL headspace. Both compartments were purged with 2 % CH<sub>4</sub> in N<sub>2</sub> for 30 minutes prior to electrolysis and the amount of hydrogen determined using gas chromatography (see above). The partial pressure of H<sub>2</sub> was calculated to account for dissolved gas in the solution and this was added to the amount of hydrogen to obtain the Faradaic efficiency.

**Incident photon-to-current efficiency measurements.** IPCE spectra were recorded in a 3-necked one-compartment cell with a flat borosilicate glass window in N<sub>2</sub>-purged aqueous Na<sub>2</sub>SO<sub>4</sub> (0.1 M, pH 5.5). A three-electrode setup with a Pt-counter, Ag/AgCl/KCl<sub>sat</sub> reference, and a CuCrO<sub>2</sub>-based working electrode (0.25 cm<sup>2</sup> active area) was used. Monochromatic light was supplied using a 300 W Xenon lamp coupled to a monochromator (MSH300, LOT quantum design). The intensity was adjusted to 1.0 mW cm<sup>-2</sup> for each wavelength and the applied potential maintained at 0.0 V vs. RHE. Triplicate data was acquired for each electrode tested.

**Treatment of data.** All analytical measurements were performed in triplicate and are given as unweighted mean ± standard deviation (σ) unless otherwise stated. σ of a measured value was calculated using equation (2).

$$\sigma = \sqrt{\frac{\sum(x-\bar{x})^2}{n-1}} \quad (2)$$

Where *n* is the number of repeated measurements, *x* is the value of a single measurement and  $\bar{x}$  is the unweighted mean of the measurements. σ was increased to 5 % of  $\bar{x}$  in the event that the calculated σ was below this threshold.

## Supporting Figures

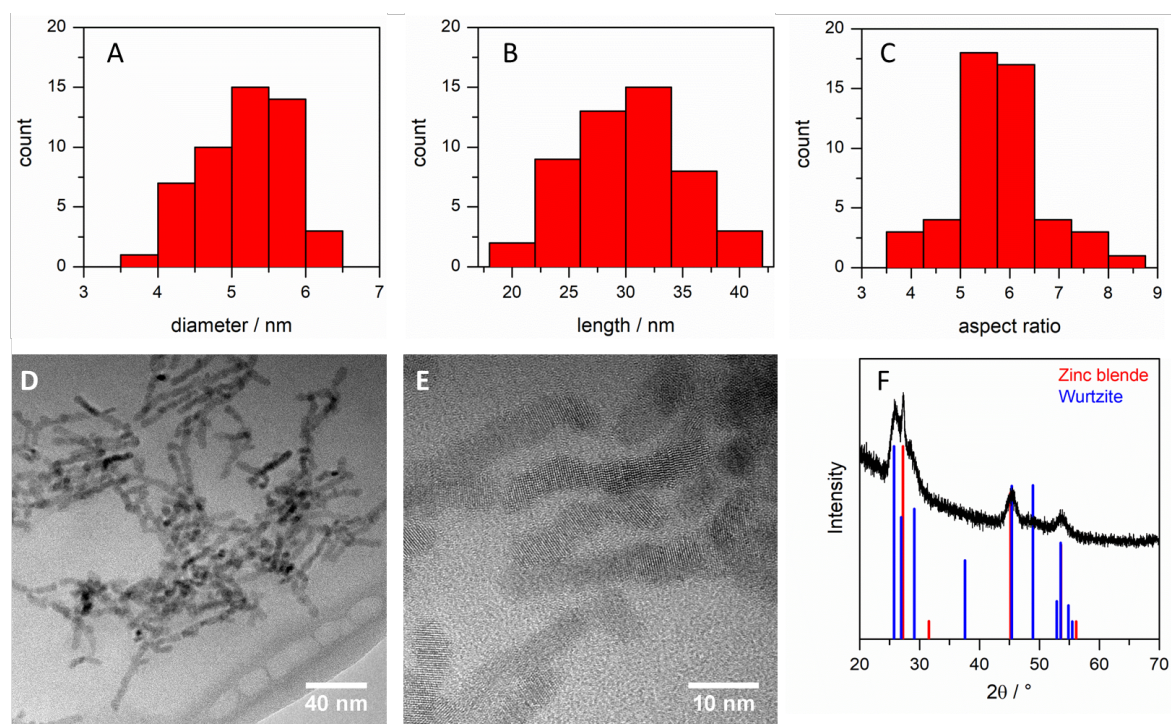

**Figure S1.** Physical characterization of ligand-free ZnSe nanorods. (A-C) Size distribution from (D-E) transmission electron micrographs; powder X-ray diffractogram with comparison to zinc blende-ZnSe (PDF 01-0715977 37-1463) and Wurtzite-ZnSe (PDF 01-089-2940 15-105).

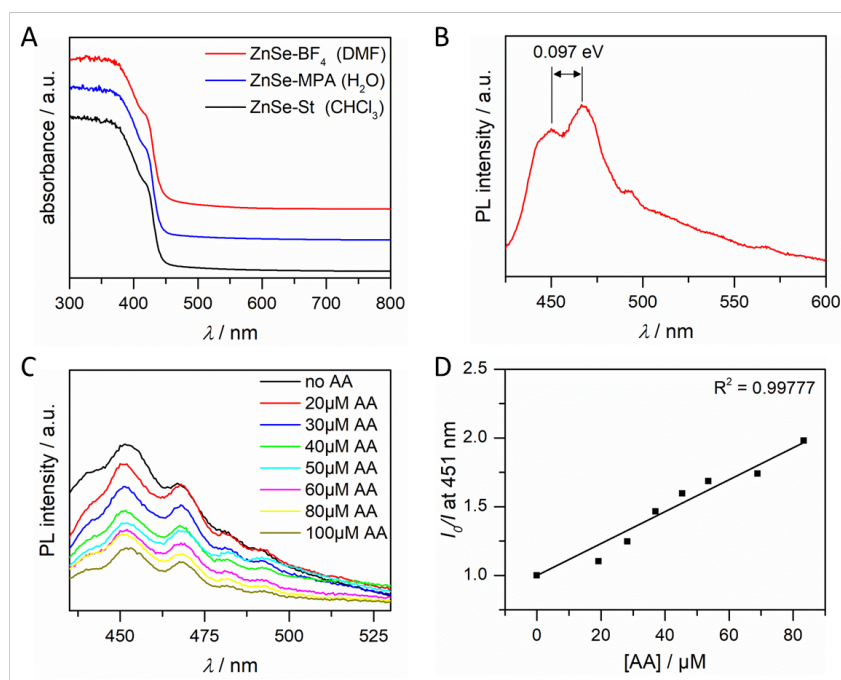

**Figure S2.** (A) Stacked UV-visible absorption spectra of ZnSe nanorods with different capping ligands. (B) Photoluminescence emission spectrum of ZnSe-BF<sub>4</sub> in DMF with indicated separation of the two emission maxima attributed to Zinc blende (467 nm) and Wurtzite (451 nm) polymorphs (excitation at 370 nm).<sup>[4]</sup> (C) PL quenching of aqueous ZnSe-BF<sub>4</sub> in the presence of ascorbic acid (AA) at various concentrations (excitation at 390 nm) and (D) corresponding Stern-Volmer plot of the PL intensity at 451 nm.

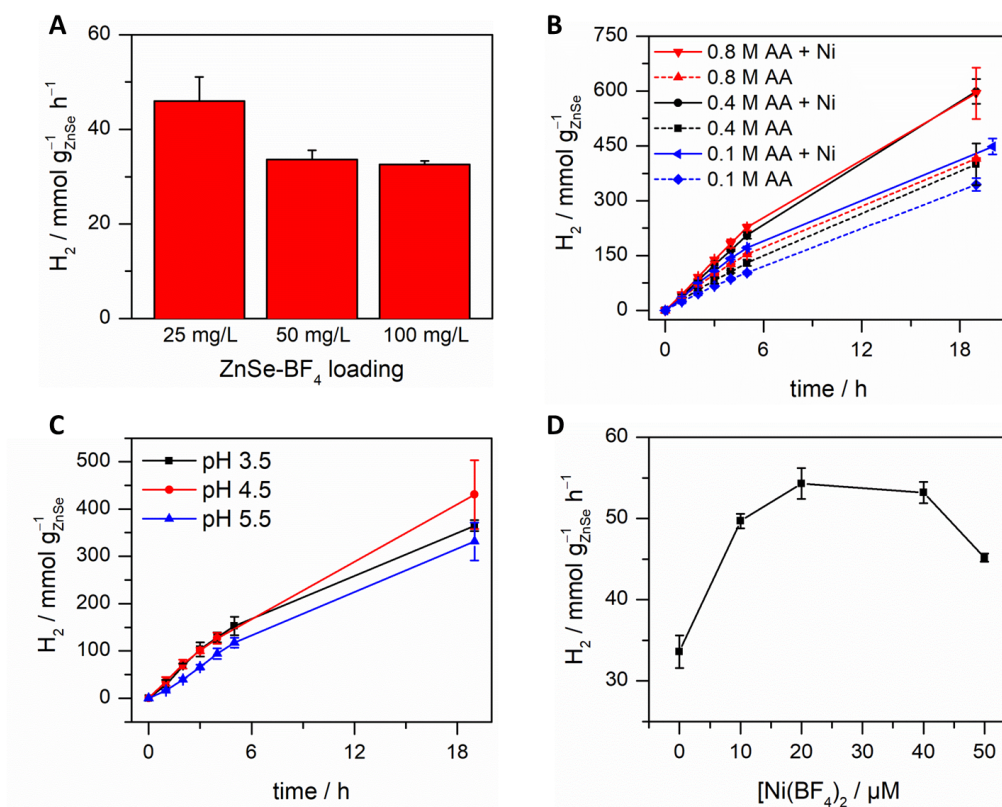

**Figure S3.** Optimization of the photocatalytic H<sub>2</sub> generation using aqueous ZnSe-BF<sub>4</sub> NRs. (A) Variation of NR concentration (3 h irradiation). (B) Variation of the AA concentration. (C) Variation of the solution pH. (D) Variation of the co-catalyst concentration (3 h irradiation). Conditions unless otherwise stated: 50 mg L<sup>-1</sup> ZnSe-BF<sub>4</sub>, 0.4 M AA, pH 4.5, 25 °C, 100 mW cm<sup>-2</sup>, AM 1.5G, λ >400 nm, under N<sub>2</sub>. Lines between data points have been added to guide the eye.



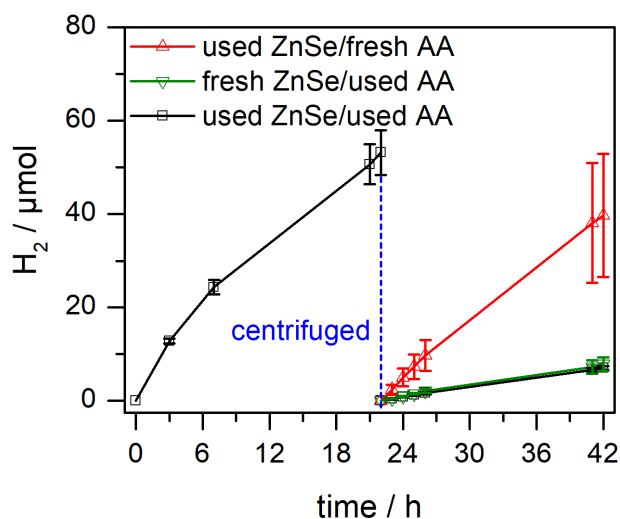

**Figure S4.** Long-term photocatalytic H<sub>2</sub> generation using aqueous ZnSe-NRs. After 21 h irradiation, samples were centrifuged, and separated precipitate was re-suspended in fresh aq. AA (0.4 M, pH 4.5), or in used aq. AA (supernatant from the same sample), or fresh ZnSe-BF<sub>4</sub> stock solution (6.39 mg ZnSe mL<sup>-1</sup>, 15.6 μL) was added to used aq. AA (supernatant from another sample). Conditions: 50 mg L<sup>-1</sup> ZnSe-BF<sub>4</sub>, 0.4 M AA, pH 4.5, 25 °C, 100 mW cm<sup>-2</sup> AM 1.5G, λ >400 nm, under N<sub>2</sub>. Lines between data points have been added to guide the eye.

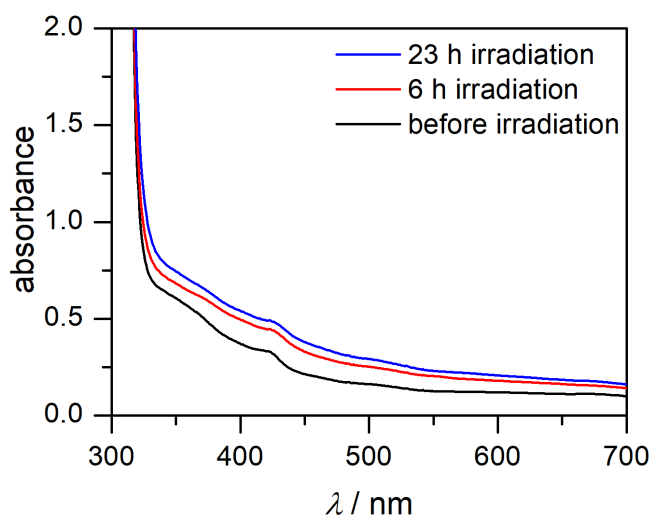

**Figure S5.** UV-vis spectra of ZnSe-BF<sub>4</sub> NRs during long-term photocatalytic H<sub>2</sub> generation. Conditions: 50 mg L<sup>-1</sup> ZnSe-BF<sub>4</sub>, 20 μM Ni(BF<sub>4</sub>)<sub>2</sub>·6 H<sub>2</sub>O, 0.4 M AA, pH 4.5, illuminated with 1.00 mW cm<sup>-2</sup>, λ = 400±5 nm, under N<sub>2</sub>, room temperature.

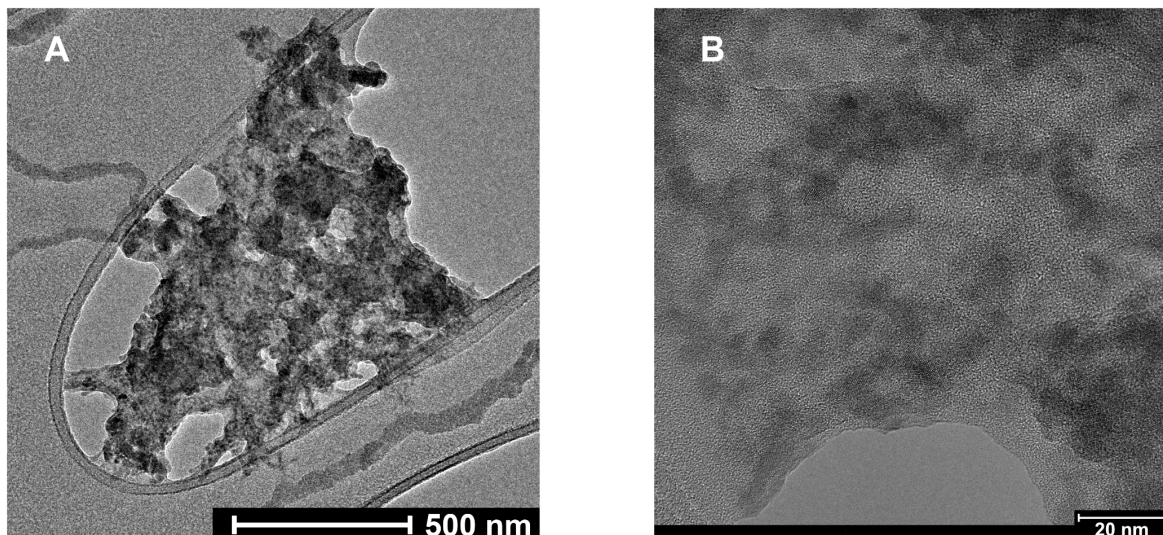

**Figure S6.** TEM images of ZnSe-BF<sub>4</sub> NRs after 3 hours photocatalytic H<sub>2</sub> generation. Image (A) shows a NR aggregate and (B) confirms the nanocrystalline features which are retained after catalysis. Conditions: 50 mg L<sup>-1</sup> ZnSe-BF<sub>4</sub>, 0.4 M AA, pH 4.5, 25 °C, 100 mW cm<sup>-2</sup> AM 1.5G,  $\lambda > 400$  nm, under N<sub>2</sub>.

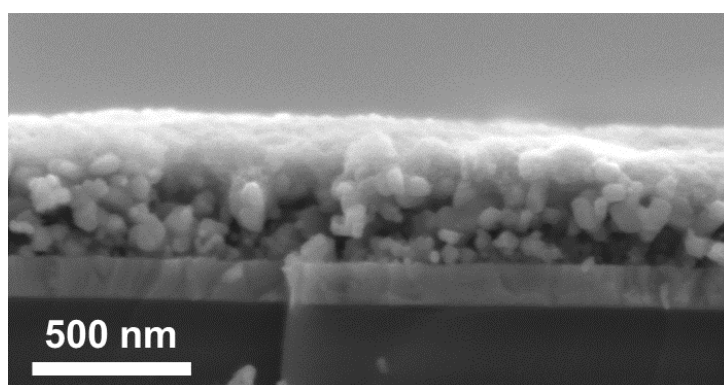

**Figure S7.** Cross-sectional SEM image of the as-assembled CuCrO<sub>2</sub>|ZnSe photocathode.

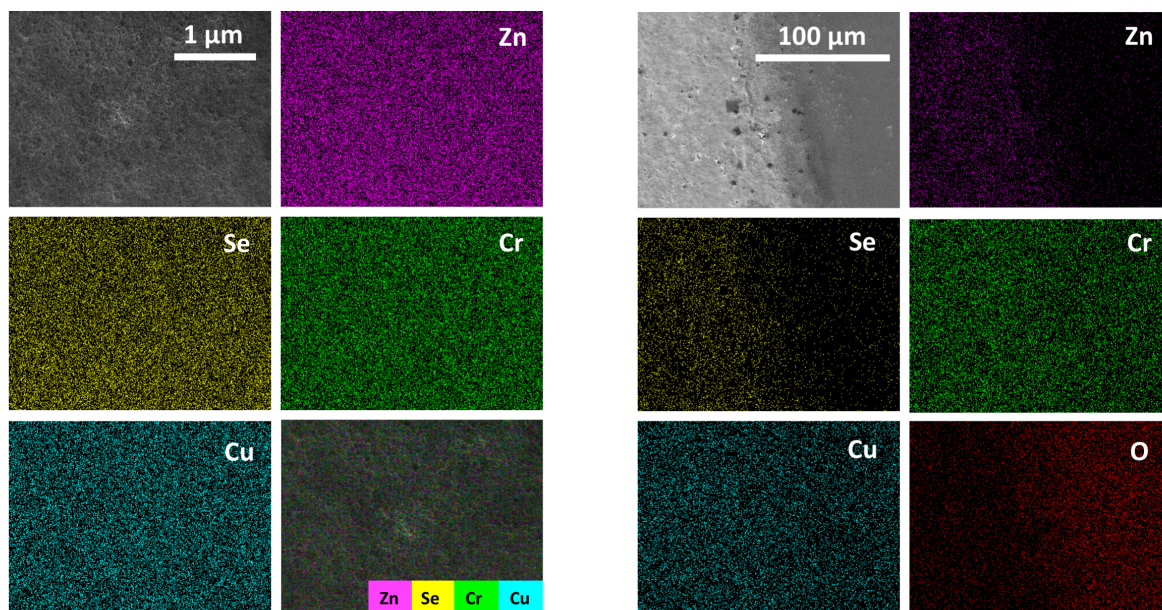

**Figure S8.** Energy-dispersive X-ray (EDX) spectra of the  $\text{CuCrO}_2|\text{ZnSe}$  electrode. Left: Top-down view. Right: View of ZnSe-modified and bare  $\text{CuCrO}_2$  areas.

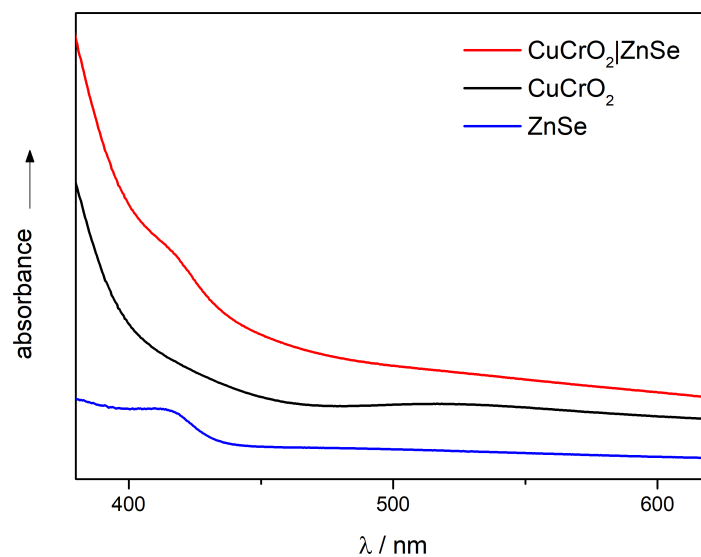

**Figure S9.** Stacked UV-vis spectra of a  $\text{CuCrO}_2$  electrode before (black) and after (red) immobilization of ZnSe- $\text{BF}_4$  NRs (blue).

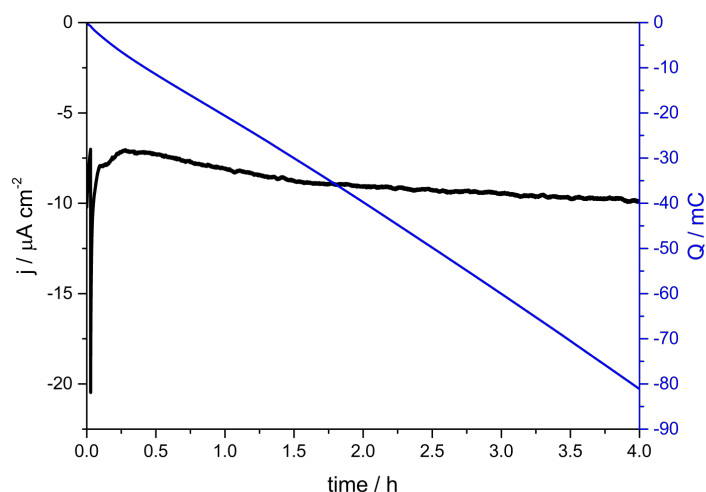

**Figure S10.** Controlled potential photoelectrolysis (CPPE) of a  $\text{CuCrO}_2|\text{ZnSe}$  photocathode ( $1 \text{ cm}^2$  active geometrical area) held at 0 V vs. RHE. Conditions: aqueous  $\text{Na}_2\text{SO}_4$  (0.1 M, pH 5.5), illuminated with  $100 \text{ mW cm}^{-2}$ , AM 1.5G, using a 400 nm cut-off filter, room temperature.

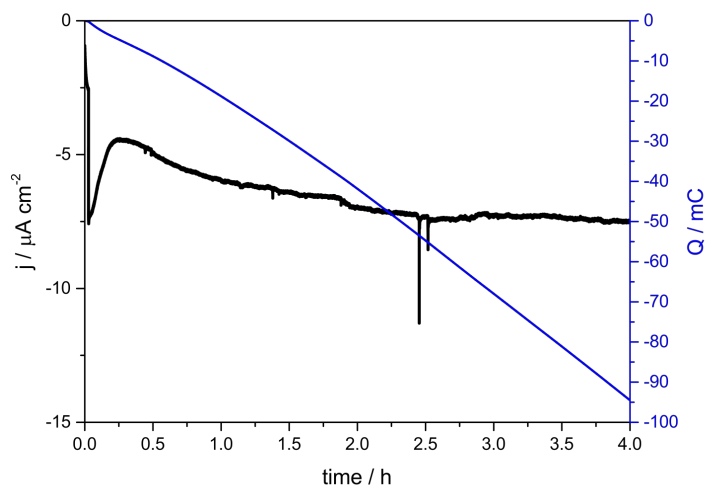

**Figure S11.** Controlled potential photoelectrolysis of a  $\text{CuCrO}_2|\text{ZnSe}$  photocathode ( $1 \text{ cm}^2$  active area) in the presence of  $20 \mu\text{M Ni}(\text{BF}_4)_2$  held at 0 V vs. RHE under visible-light irradiation. Conditions: aqueous  $\text{Na}_2\text{SO}_4$  (0.1 M, pH 5.5), illuminated with  $100 \text{ mW cm}^{-2}$ , AM 1.5G, using a 400 nm cut-off filter, room temperature.

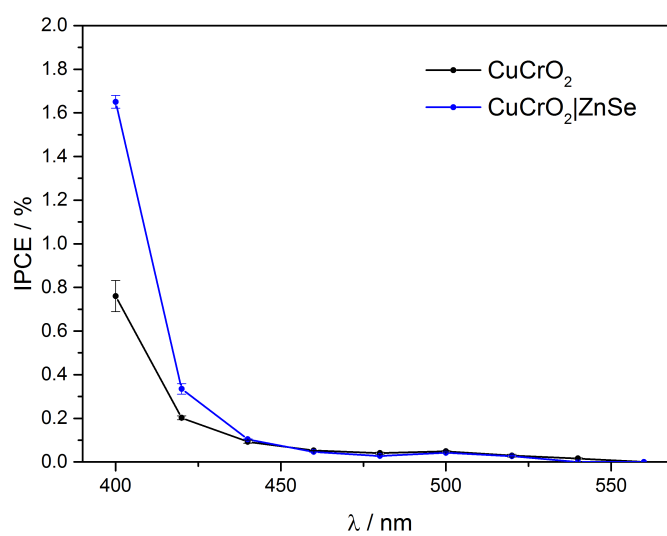

**Figure S12.** IPCE spectrum for  $\text{CuCrO}_2$  (black) and  $\text{CuCrO}_2|\text{ZnSe}$  (blue) electrodes recorded in aqueous  $\text{Na}_2\text{SO}_4$  (0.1 M, pH 5.5) at an applied potential of 0.0 V vs. RHE with light intensity maintained at  $1.0 \text{ mW cm}^{-2}$ .

## Supporting Tables

**Table S1.** Optimization of the photocatalytic H<sub>2</sub> generation using ZnSe nanorods. Unless otherwise stated, conditions were: 50 mg L<sup>-1</sup> ZnSe-BF<sub>4</sub>, 20 μM Ni(BF<sub>4</sub>)<sub>2</sub>×6H<sub>2</sub>O in 2 mL 0.4 M aq. AA, pH 4.5 under N<sub>2</sub>; 3 h irradiation at 100 mW cm<sup>-2</sup>, AM 1.5G, λ >400 nm, 25 °C).

| different co-catalysts added                          |                                                             |                           |                                                                                          |
|-------------------------------------------------------|-------------------------------------------------------------|---------------------------|------------------------------------------------------------------------------------------|
| co-catalyst                                           | c(co-catalyst) / μM                                         | n(H <sub>2</sub> ) / μmol | activity / mmol <sub>H<sub>2</sub></sub> g <sub>ZnSe</sub> <sup>-1</sup> h <sup>-1</sup> |
| none                                                  | 0                                                           | 10.06±0.60                | 33.6±2.0                                                                                 |
| Fe(BF <sub>4</sub> ) <sub>2</sub> × 6H <sub>2</sub> O | 20 μM                                                       | 12.31±1.16                | 41.0±3.9                                                                                 |
| Co(BF <sub>4</sub> ) <sub>2</sub> × 6H <sub>2</sub> O | 20 μM                                                       | 13.72±0.38                | 45.8±1.3                                                                                 |
| Ni(BF <sub>4</sub> ) <sub>2</sub> × 6H <sub>2</sub> O | 20 μM                                                       | 16.24±0.58                | 54.3±1.9                                                                                 |
| K <sub>2</sub> PtCl <sub>4</sub>                      | 20 μM                                                       | 0.30±0.16                 | 0.99±0.52                                                                                |
| Pt NPs                                                | 20 μM                                                       | 1.50±0.11                 | 4.99±0.36                                                                                |
| varying co-catalyst concentration                     |                                                             |                           |                                                                                          |
| co-catalyst                                           | c(co-catalyst) / μM                                         | n(H <sub>2</sub> ) / μmol | activity / mmol <sub>H<sub>2</sub></sub> g <sub>ZnSe</sub> <sup>-1</sup> h <sup>-1</sup> |
| Ni(BF <sub>4</sub> ) <sub>2</sub> × 6H <sub>2</sub> O | 0                                                           | 10.06±0.60                | 33.6±2.0                                                                                 |
| Ni(BF <sub>4</sub> ) <sub>2</sub> × 6H <sub>2</sub> O | 10                                                          | 14.86±0.27                | 49.7±0.9                                                                                 |
| Ni(BF <sub>4</sub> ) <sub>2</sub> × 6H <sub>2</sub> O | 20                                                          | 16.24±0.58                | 54.3±1.9                                                                                 |
| Ni(BF <sub>4</sub> ) <sub>2</sub> × 6H <sub>2</sub> O | 40                                                          | 15.92±0.39                | 53.2±1.3                                                                                 |
| Ni(BF <sub>4</sub> ) <sub>2</sub> × 6H <sub>2</sub> O | 50                                                          | 13.52±0.14                | 45.2±0.5                                                                                 |
| different capping ligands                             |                                                             |                           |                                                                                          |
| Photocatalyst                                         | co-catalyst                                                 | n(H <sub>2</sub> ) / μmol | activity / mmol <sub>H<sub>2</sub></sub> g <sub>ZnSe</sub> <sup>-1</sup> h <sup>-1</sup> |
| ZnSe-BF <sub>4</sub>                                  | none                                                        | 10.06±0.60                | 33.6±2.0                                                                                 |
| ZnSe-BF <sub>4</sub>                                  | 20 μM Ni(BF <sub>4</sub> ) <sub>2</sub> × 6H <sub>2</sub> O | 16.24±0.58                | 54.3±1.9                                                                                 |
| ZnSe-MPA                                              | none                                                        | 6.22±0.16                 | 20.7±0.5                                                                                 |
| ZnSe-MPA                                              | 20 μM Ni(BF <sub>4</sub> ) <sub>2</sub> × 6H <sub>2</sub> O | 13.83±0.42                | 45.9±1.4                                                                                 |
| ZnSe-St                                               | none                                                        | 2.19±0.43                 | 7.3±1.4                                                                                  |
| ZnSe-St                                               | 20 μM Ni(BF <sub>4</sub> ) <sub>2</sub> × 6H <sub>2</sub> O | 3.64±0.82                 | 12.1±2.7                                                                                 |
| varying irradiation spectrum                          |                                                             |                           |                                                                                          |
| Light spectrum                                        | co-catalyst                                                 | n(H <sub>2</sub> ) / μmol | activity / mmol <sub>H<sub>2</sub></sub> g <sub>ZnSe</sub> <sup>-1</sup> h <sup>-1</sup> |
| AM 1.5G, >400 nm                                      | none                                                        | 10.06±0.60                | 33.6±2.0                                                                                 |
| AM 1.5G, >400 nm                                      | 20 μM Ni(BF <sub>4</sub> ) <sub>2</sub> × 6H <sub>2</sub> O | 16.24±0.58                | 54.3±1.9                                                                                 |
| AM 1.5G                                               | none                                                        | 23.06±2.84                | 76.9±9.5                                                                                 |
| AM 1.5G                                               | 20 μM Ni(BF <sub>4</sub> ) <sub>2</sub> × 6H <sub>2</sub> O | 41.16±0.93                | 137.2±3.1                                                                                |

| varying ZnSe concentration                                         |                                                               |                                      |                                                                                    |
|--------------------------------------------------------------------|---------------------------------------------------------------|--------------------------------------|------------------------------------------------------------------------------------|
| $c(\text{ZnSe-BF}_4)$<br>/ $\text{mg}_{\text{ZnSe}} \text{L}^{-1}$ | co-catalyst                                                   | $n(\text{H}_2)$<br>/ $\mu\text{mol}$ | activity<br>/ $\text{mmol}_{\text{H}_2} \text{g}_{\text{ZnSe}}^{-1} \text{h}^{-1}$ |
| 25                                                                 | none                                                          | $6.88 \pm 0.76$                      | $46.0 \pm 5.1$                                                                     |
| 50                                                                 | none                                                          | $10.06 \pm 0.60$                     | $33.6 \pm 2.0$                                                                     |
| 100                                                                | none                                                          | $19.47 \pm 0.41$                     | $32.6 \pm 0.7$                                                                     |
| varying AA concentration (19 h irradiation) <sup>[a]</sup>         |                                                               |                                      |                                                                                    |
| $c(\text{AA})$<br>/ M                                              | co-catalyst                                                   | $n(\text{H}_2)$<br>/ $\mu\text{mol}$ | activity<br>/ $\text{mmol}_{\text{H}_2} \text{g}_{\text{ZnSe}}^{-1} \text{h}^{-1}$ |
| 0.1                                                                | none                                                          | $34.54 \pm 1.72$                     | $18.1 \pm 0.9$                                                                     |
| 0.1                                                                | $20 \mu\text{M Ni}(\text{BF}_4)_2 \times 6\text{H}_2\text{O}$ | $46.82 \pm 2.29$ <sup>[b]</sup>      | $22.4 \pm 1.1$ <sup>[b]</sup>                                                      |
| 0.4                                                                | none                                                          | $40.08 \pm 5.73$                     | $21.0 \pm 3.0$                                                                     |
| 0.4                                                                | $20 \mu\text{M Ni}(\text{BF}_4)_2 \times 6\text{H}_2\text{O}$ | $60.03 \pm 3.40$                     | $31.5 \pm 1.8$                                                                     |
| 0.8                                                                | none                                                          | $41.63 \pm 0.22$                     | $21.9 \pm 0.1$                                                                     |
| 0.8                                                                | $20 \mu\text{M Ni}(\text{BF}_4)_2 \times 6\text{H}_2\text{O}$ | $59.52 \pm 7.01$                     | $31.3 \pm 3.7$                                                                     |
| varying pH (19 h irradiation) <sup>[a]</sup>                       |                                                               |                                      |                                                                                    |
| pH                                                                 | co-catalyst                                                   | $n(\text{H}_2)$<br>/ $\mu\text{mol}$ | activity<br>/ $\text{mmol}_{\text{H}_2} \text{g}_{\text{ZnSe}}^{-1} \text{h}^{-1}$ |
| 3.5                                                                | none                                                          | $36.35 \pm 1.14$                     | $19.2 \pm 0.6$                                                                     |
| 4.5                                                                | none                                                          | $40.08 \pm 5.73$                     | $22.7 \pm 3.8$                                                                     |
| 5.5                                                                | none                                                          | $33.04 \pm 3.99$                     | $17.4 \pm 2.1$                                                                     |

[a] Data from two independent experiments; [b] 20 h irradiation.

**Table S2.** External quantum efficiency (EQE) determination for the photocatalytic H<sub>2</sub> evolution using ZnSe-NRs (50 mg L<sup>-1</sup> ZnSe-BF<sub>4</sub>, in 2 mL 0.4 M aq. AA, pH 4.5 under N<sub>2</sub>; I = 1.00±0.01 mW cm<sup>-2</sup>, A = 0.20 cm<sup>2</sup>, λ = 400±5 nm, room temperature).

| no co-catalyst                                                                        |                                          |                        |                        |
|---------------------------------------------------------------------------------------|------------------------------------------|------------------------|------------------------|
| time / h                                                                              | n(H <sub>2</sub> ) / μmol <sup>[a]</sup> | EQE / % <sup>[b]</sup> | IQE / % <sup>[b]</sup> |
| 1                                                                                     | 0.10±0.03                                | 7.6±2.0                | 11.8±3.3               |
| 2                                                                                     | 0.37±0.02                                | 24.1±0.9               | 36.1±2.4               |
| 3                                                                                     | 0.68±0.03                                | 26.8±1.1               | 38.7±1.1               |
| 4                                                                                     | 0.99±0.04                                | 26.2±1.1               | 37.7±1.6               |
| 5                                                                                     | 1.30±0.04                                | 25.8±1.0               | 36.9±1.6               |
| 6                                                                                     | 1.60±0.04                                | 24.9±0.5               | 35.7±0.7               |
| average over hours 3–6                                                                |                                          | 25.9±1.2               | 37.2±1.7               |
| with added co-catalyst (20 μM Ni(BF <sub>4</sub> ) <sub>2</sub> × 6 H <sub>2</sub> O) |                                          |                        |                        |
| time / h                                                                              | n(H <sub>2</sub> ) / μmol <sup>[a]</sup> | EQE / % <sup>[b]</sup> | IQE / % <sup>[b]</sup> |
| 1                                                                                     | 0.10±0.01                                | 8.2±1.2                | 12.5±1.3               |
| 2                                                                                     | 0.42±0.03                                | 27.3±1.8               | 39.2±2.5               |
| 3                                                                                     | 0.82±0.07                                | 34.0±3.1               | 48.3±4.1               |
| 4                                                                                     | 1.25±0.07                                | 36.5±0.5               | 51.1±0.9               |
| 5                                                                                     | 1.67±0.08                                | 35.4±1.3               | 49.3±0.9               |
| 6                                                                                     | 2.12±0.08                                | 37.5±2.9               | 52.3±5.0               |
| average over hours 3–6                                                                |                                          | 35.9±2.6               | 50.2±3.6               |

[a] Cumulative H<sub>2</sub> measured in headspace.

[b] Quantum efficiency measured per time interval.

**Table S3.** Control experiments for the photocatalytic H<sub>2</sub> generation using ZnSe-BF<sub>4</sub>. Unless otherwise stated, conditions were: 50 mg L<sup>-1</sup> ZnSe-BF<sub>4</sub>, 20 μM Ni(BF<sub>4</sub>)<sub>2</sub> × 6 H<sub>2</sub>O in 2 mL 0.4 M aq. AA, pH 4.5 under N<sub>2</sub>; 100 mW cm<sup>-2</sup>, AM 1.5G, λ >400 nm, 25 °C.

| description             | time / h | n(H <sub>2</sub> ) ± σ / μmol |
|-------------------------|----------|-------------------------------|
| standard experiment     | 19       | 72.43±1.75                    |
| no Ni(BF <sub>4</sub> ) | 19       | 45.01±2.42                    |
| no AA                   | 20       | 0.015±0.011                   |
| no light                | 21       | not detected                  |
| no ZnSe-BF <sub>4</sub> | 19       | not detected                  |



**Table S4.** Determination of ZnSe loading on CuCrO<sub>2</sub> using ICP-OES. Conditions: Digestion in 10% v/v HNO<sub>3</sub> in MilliQ® H<sub>2</sub>O, 1 cm<sup>2</sup> electrode

| photoelectrode                | Zn <sup>2+</sup><br>/ μg cm <sup>-2</sup> | Se <sup>2-</sup><br>/ μg cm <sup>-2</sup> |
|-------------------------------|-------------------------------------------|-------------------------------------------|
| CuCrO <sub>2</sub>            | 0.1 ± 0.1                                 | 0                                         |
| CuCrO <sub>2</sub>   ZnSe-NRs | 6.4 ± 0.3                                 | 7.0 ± 0.4                                 |

**Table S5.** Controlled-potential photoelectrolysis using a CuCrO<sub>2</sub> | ZnSe photocathode. Conditions: 0.1 M NaSO<sub>4</sub> (pH 5.5), E<sub>app</sub> = 0 V vs. RHE, illumination of 100 mW cm<sup>-2</sup>, AM 1.5G, λ > 400 nm, 1 cm<sup>2</sup> active area.

| photoelectrode                                                  | time<br>/ h    | n(H <sub>2</sub> ) <sup>[a]</sup><br>/ nmol cm <sup>-2</sup> | F.E.<br>/ %      |
|-----------------------------------------------------------------|----------------|--------------------------------------------------------------|------------------|
| CuCrO <sub>2</sub>   ZnSe-NRs (entry 1)                         | 4              | 38.2                                                         | 9.0              |
| CuCrO <sub>2</sub>   ZnSe-NRs (entry 2)                         | 4              | 31.9                                                         | 7.6              |
| CuCrO <sub>2</sub>   ZnSe-NRs (entry 3)                         | 4              | 34.0                                                         | 5.2              |
|                                                                 | <b>average</b> | <b>34.7 ± 3.2</b>                                            | <b>7.3 ± 1.9</b> |
| CuCrO <sub>2</sub>   ZnSe-NRs   Ni <sup>2+</sup> <sup>[b]</sup> | 4              | 47.8                                                         | 9.7              |
| CuCrO <sub>2</sub> blank                                        | 4              | not detected                                                 | –                |

[a] corrected for the dissolved H<sub>2</sub> using Henry's law; [b] in presence of 20 μM Ni(BF<sub>4</sub>)<sub>2</sub>

## Supporting references

- [1] P. Reiss, G. Quemard, S. Carayon, J. Bleuse, F. Chandezon, A. Pron, *Mater. Chem. Phys.* **2004**, *84*, 10-13.
- [2] M. F. Kuehnel, C. D. Sahm, G. Neri, J. R. Lee, K. L. Orchard, A. J. Cowan, E. Reisner, *Chem. Sci.* **2018**, *9*, 2501-2509.
- [3] C. M. Chang, K. L. Orchard, B. C. M. Martindale, E. Reisner, *J. Mater. Chem. A* **2016**, *4*, 2856-2862.
- [4] C.-Y. Yeh, S.-H. Wei, A. Zunger, *Phys. Rev. B* **1994**, *50*, 2715-2718.

End of Supporting Information
